# Supplementary material for: Pancreatic cancer is marked by complement-high blood monocytes and tumor-associated macrophages
Source: Life Sci Alliance. 2021 Mar 29;4(6):e202000935. doi: 10.26508/lsa.202000935 (PMC8091600; doi:10.26508/lsa.202000935)
Supplement: Supplementary file 1 [file LSA-2020-00935_SdataFS1.xlsx]

## Sheet: Supplementary Figure 1
Supplementary Figure 1
Supplementary Fig. 1A
CD45+			CD45+ CD11b+			Ly-6C+ Ly-6G+			CD11b+ F4/80+			F4/80+ CD206+
Control liver	Tumor-bearing liver		Control liver	Tumor-bearing liver		Control liver	Tumor-bearing liver		Control liver	Tumor-bearing liver		Control liver	Tumor-bearing liver
50.27	60.81		4.9	13.75		2.12	6.4		6.64	16.13		68.95	81.79
44.74	72.75		5	25.26		1.55	10.13		5.88	20.16		52.03	69.08
54.48	71.42		5.48	19.88		3.21	7.75		6.84	18.52		64.59	77.07
50.62	52.34		4.93	15.25		2.42	5.35		6.4	10.75		67.78	75.67
	62.09			17.3			7.36			18.65			73.78
Supplementary Fig. 1B
CD45+ CD11b+			Ly-6C+ Ly-6G+			CD45+ CD3+			CD3+ CD8+
Control	Tumor		Control	Tumor		Control	Tumor		Control	Tumor
11.31	55.4		4.28	56.88		11.3	5.78		6.23	2.84
14.24	64.16		9.26	41.49		15.29	5.09		10.33	2.87
30.26	33.77		9.91	25.37		13.96	4.62		8.99	1.93
29.34	37.43		16.32	23.13		10.72	6.85		6.69	4.85
26.31	38.86		11.13	29.03		11.16	8.42		6.85	5.08
Supplementary Fig. 1D
CD45+ CD11b+			Ly-6C+ Ly-6G+			CD11b+ F4/80+			CD45+ NK1.1+			CD45+ CD3+			CD3+ CD4+
Control	Tumor		Control	Tumor		Control	Tumor		Control	Tumor		Control	Tumor		Control	Tumor
78.69	87.99		39.8	44.71		67.03	82.47		4.22	3.61		12.65	1.7		6.7	1.83
68.74	70.47		45.72	27.93		58.06	67.96		2.84	5.61		7.56	4.18		3.19	2.02
82	46.77		33.49	22.94		72.1	48.7		3.4	4.36		3.26	3.58		3.26	1.74
86.03	70.11		24.51	22.87		71.54	60.86		4.42	3.69		6.82	3.98		17.03	3.26
76.83	65.98		31.85	44.85		63.22	61.44		4.59	3.1		8.28	6.83		9.67	1.33
64.22	80.54		28.19	14.35		71.67	68.55		8.9	3.64		2.27	1.23		5.57	7.59
81.76	83.46		32.64	17.56		70.34	64.25		8.98	4.69		9.83	2.98		4.49	6.06
81.04	60.44		32.26	26.1		61.15	74.58		5.33	7.56		3.89	1.62		2.46	6.02
84.31	73.72		19.66	23.88		52.93	71.05		4.52	0.93		7.36	3.86		4.15	3.89
62.27	67.6		20.4			58.11	65.77		6.69	2.49		10.33	3.34		4.12	1.39
